# Supplementary material
Source: PubMed Central journal article supplement (PMC4788263)
Supplement: wisj840355.w2_default.pdf [file wisj840355.w2_default.pdf]

## 1. Default Section

\* 1. What is your primary profession?

Physician

Researcher

Nurse

Statistician

Other (please specify)

\* 2. Which academic degree(s) do you hold? (Check all that apply)

MD

PhD

MPH

MA/MS

RN

LLB

MBA

Other (please specify)

\* 3. Do you have an academic appointment?

Yes

No

\* 4. What academic title(s) do you hold?

- Professor
- Associate Professor
- Assistant Professor
- Instructor
- Adjunct Professor
- Professor Emeritus
- Dean
- Administrator
- Other (please specify)

3.

\* 5. What is your age?

Under 30

30-39

40-49

50-59

60-69

70-79

80 or older

\* 6. What is your gender?

Male

Female

\* 7. Approximately how many articles have you published in peer-reviewed biomedical journals during the last 5 years, 2003-2008?

1

2-4

5-10

10-20

>20

The following questions refer to your article cited in the invitation email for this survey.

\* 8. Think about your role in the development of this article. Check all of the functions you performed for this article:

- Supervising the work or any of the coauthors
- Recruiting coauthors (if any)
- Recruiting study subjects
- Analyzing/interpreting data
- Conducting literature review
- Analyzing/interpreting literature
- Reviewing the manuscript
- Communicating with journal editor(s)
- Signing statement of copyright transfer or publication license
- Conceiving and designing the work
- Collecting data or other material
- Obtaining funding or material support
- Performing statistical analysis
- Approving manuscript before submission to a journal
- Writing the manuscript or part of the manuscript
- Revising the manuscript, making important changes in content
- Reviewing page proofs or the journal's edited version of the manuscript

\* 9. Would you feel comfortable explaining the major conclusions of this article in a public presentation?

Yes

No

\* 10. Did you have any coauthors for this article?

Yes

No

\* 11. Below is a list of common author tasks. For each task, please indicate "yes" if any of your coauthors performed only one of these tasks, and nothing else, while working on this article. (Mark yes or no for each task).

|                                                                         | Yes                   | No                    |
|-------------------------------------------------------------------------|-----------------------|-----------------------|
| I had no coauthors                                                      | <input type="radio"/> | <input type="radio"/> |
| Supervising the work or any of the coauthors                            | <input type="radio"/> | <input type="radio"/> |
| Recruiting coauthors                                                    | <input type="radio"/> | <input type="radio"/> |
| Recruiting study subjects                                               | <input type="radio"/> | <input type="radio"/> |
| Analyzing/interpreting data                                             | <input type="radio"/> | <input type="radio"/> |
| Conducting literature search                                            | <input type="radio"/> | <input type="radio"/> |
| Analyzing/interpreting literature                                       | <input type="radio"/> | <input type="radio"/> |
| Reviewing the manuscript                                                | <input type="radio"/> | <input type="radio"/> |
| Communicating with journal editor(s)                                    | <input type="radio"/> | <input type="radio"/> |
| Signing statement of copyright transfer or publication license          | <input type="radio"/> | <input type="radio"/> |
| Conceiving and designing the work                                       | <input type="radio"/> | <input type="radio"/> |
| Collecting data                                                         | <input type="radio"/> | <input type="radio"/> |
| Obtaining funding or material support                                   | <input type="radio"/> | <input type="radio"/> |
| Performing statistical analysis                                         | <input type="radio"/> | <input type="radio"/> |
| Writing the manuscript or part of the manuscript                        | <input type="radio"/> | <input type="radio"/> |
| Approving manuscript before submission to a journal                     | <input type="radio"/> | <input type="radio"/> |
| Revising the manuscript, making important changes in content            | <input type="radio"/> | <input type="radio"/> |
| Reviewing page proofs or the journal's edited version of the manuscript | <input type="radio"/> | <input type="radio"/> |

NOTE: This question on honorary authorship from the 1996 survey was slightly modified for ease of use in the Internet-based survey for this study. Some implausible responses were discovered to that question after the survey was completed, therefore all corresponding authors of multi-authored articles were re-surveyed (n=501) with a single question worded exactly like the question in the earlier survey. See reworded question as it was sent at the end of this file.

5.

\* 12. What was your primary role in the actual writing of this article, excluding minor editing and proofreading? (Check only one)

Wrote the entire article

Wrote major part(s) of the article

Wrote minor part(s) of the article

Revised the article (ie, made important corrections and changes in content)

Supervised the writing of others

Did not participate in the actual writing of this article

\* 13. Who assisted you in writing this article ? (Check only one)

No one, I wrote the entire article

One or more of the other listed authors

Someone, not an author, listed in footnote or acknowledgment

Someone, not an author, and not listed in the article

\* 14. Who assisted you with the writing? (Check all that apply)

- Colleague
- Medical writer or editor in your institution
- Independent medical writer or editor
- Writer or editor at sponsor/funder
- Writer or editor at a medical communications company
- Friend or relative
- Not sure
- Other (please specify)



\* 15. Who decided the order of authorship? (Check only one)

I am the only author

I did

The most senior author

Another author

We decided as a group

The funding source

Other (please specify)

\* 16. How did you decide the order of authorship? The authors are listed... (Check only one)

in the order of the amount each contributed

in the order of the amount each contributed and the first 2 authors contributed equally to the work.

by the order of the amount each contributed, except the last author who is most senior in the group.

by alphabetical order

another method (please explain)

\* 17. How many persons not listed as an author on this article made contributions you feel merited authorship? (Check only one)

0

1

2

3

4

5

>5

\* 18. How many persons—who are not listed as an author—provided other contributions (eg, data collection, analysis, writing or editing assistance, or technical assistance) and are listed in the acknowledgment? (Check only one)

0

1

2

3

4

5

>5

\* 19. How many persons —who are not listed as an author—provided other contributions (eg, data collection, analysis, writing or editing assistance, or technical assistance) and are not listed in the acknowledgment? (Check only one)

0

1

2

3

4

5

>5

\* 20. Did you or your institution receive funding for the work reported in this article?

Yes

No

\* 21. What was the source of funding? (Check all that apply)

- Your employer
- Nonprofit organization, foundation, or charity
- Government institution or agency
- Industry or commercial entity
- Journal/publisher
- Other (please specify)

\* 22. What was the role of the sponsor/funder in the work represented in this article? (Check all that apply)

- Designed and/or conducted the study
- Provided data
- Provided study materials
- Collected data
- Managed data
- Analyzed data
- Interpreted data
- Invited me to participate
- Wrote the manuscript or a first draft
- Reviewed and/or approved the manuscript
- Helped answer questions during manuscript preparation, review/revision, and publication
- Submitted the manuscript to the journal
- No role other than providing the funding
- Other (please specify)

12.

\* 23. Did you or your institution receive funding for the writing of the article?

Yes

No

\* 24. What was the source of funding? (Check all that apply)

- Your employer
- Nonprofit organization, foundation, or charity
- Government institution or agency
- Industry or commercial entity
- Journal/publisher
- Other (please specify)

\* 25. What was the role of the sponsor/funder in the writing of this article? (Check all that apply)

- Invited me to participate
- Wrote the manuscript or a first draft
- Reviewed and/or approved the manuscript
- Helped answer questions during manuscript preparation, review/revision, and publication
- Submitted the manuscript to the journal
- No role other than providing the funding

\* 26. Have you ever used a professional medical writer to assist you in preparing a manuscript for publication?

Yes

No

\* 27. Should someone whose only role was assisting in the writing of a manuscript be acknowledged in the published article?

Yes

No

\* 28. Where should credit for writing assistance be? (Check only one)

In the byline as an author

In a footnote on the first page of the article

In an acknowledgment at the end of the article

It depends on the amount of writing and whether that person meets criteria for authorship or not

Such assistance is not necessary to be noted in the article

No opinion



\* 29. Some journals publish detailed information on authors. How important is it for journals to publish...

|                                       | Very important | Important | Somewhat important | Not very important | Not at all important |
|---------------------------------------|----------------|-----------|--------------------|--------------------|----------------------|
| Academic Degrees of Authors           | jn             | jn        | jn                 | jn                 | jn                   |
| Institutional Affiliations of Authors | jn             | jn        | jn                 | jn                 | jn                   |
| Contributions of Authors              | jn             | jn        | jn                 | jn                 | jn                   |
| Conflicts of Interest of Authors      | jn             | jn        | jn                 | jn                 | jn                   |
| Funding Source(s)                     | jn             | jn        | jn                 | jn                 | jn                   |
| Photographs of authors                | jn             | jn        | jn                 | jn                 | jn                   |

30. Is there anything you would like to add about authorship in scholarly and medical journals, or about this survey?

## 1. Default Section

1. How many of your coauthors had only one of the following functions, meaning they did only one of these functions and nothing else? (For each function below, give the number of coauthors who did only that function):

Supervising the work or any of the coauthors

Recruiting coauthors

Recruiting study subjects

Analyzing/interpreting data

Conducting literature search

Analyzing/interpreting literature

Reviewing the manuscript

Communicating with journal editor (s)

Signing statement of copyright transfer to journal

Conceiving and designing the work

Collecting data

Obtaining funding or material support

Performing statistical analysis

Writing the manuscript or part of the manuscript

Approving manuscript before submission to a journal

Revising the manuscript, making important changes in content

Reviewing page proofs or the journal's edited version of the manuscript

**NOTE:** This question on honorary authorship from the 1996 survey was slightly modified for ease of use in the Internet-based survey for this study. Some implausible responses were discovered to that question after the survey was completed, therefore all corresponding authors of multi-authored articles were re-surveyed (n=501) with this single question worded exactly like the question in the earlier survey.
